# Supplementary material for: The novel PIAS-like protein hZimp10 is a transcriptional co-activator of the p53 tumor suppressor
Source: PubMed Central journal article supplement — Nucleic Acids Res. 2007 Jun 21;35(13):4523–34. doi: 10.1093/nar/gkm476 (PMC1935018; doi:10.1093/nar/gkm476), 2007-06-21
Supplement: nar_gkm476_1.pdf [file nar_gkm476_1.pdf]

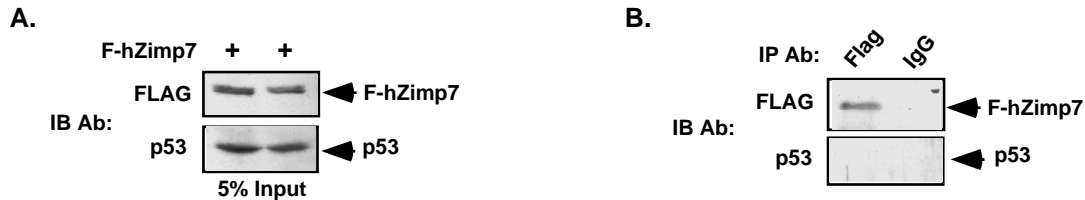

**S-Figure 1.** Examining the potential interaction between p53 and hZimp7 by immunoprecipitation. HEK293 cells were transfected with pcDNA3-HA-p53 (0.2  $\mu$ g) and pcDNA3-FLAG-tagged hZimp10 (1.8  $\mu$ g). 5% of the total lysate volume (input) was probed with anti-FLAG antibody or anti-p53 antibody (A). The rest of cell lysates were then immunoprecipitated with the anti-Flag antibody or normal IgG, and analyzed on SDS-PAGE by Flag antibody or p53 antibody (B).
