# Supplementary material for: The novel PIAS-like protein hZimp10 is a transcriptional co-activator of the p53 tumor suppressor
Source: PubMed Central journal article supplement — Nucleic Acids Res. 2007 Jun 21;35(13):4523–34. doi: 10.1093/nar/gkm476 (PMC1935018; doi:10.1093/nar/gkm476), 2007-06-21
Supplement: nar_gkm476_2.pdf [file nar_gkm476_2.pdf]

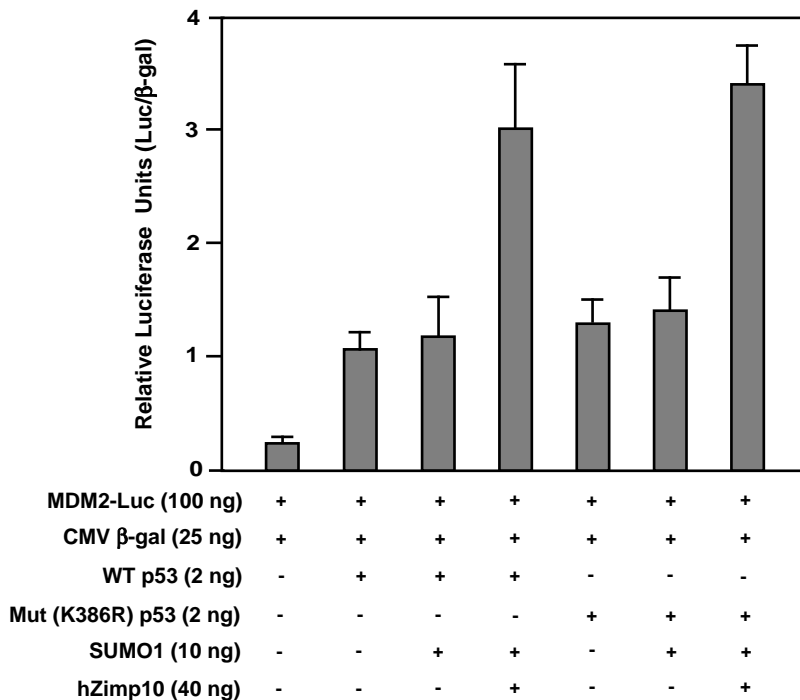

**S-Figure 2.** hZimp10 augments wild type and mutated p53 mediated transcription. Luciferase assays were performed on lysates from HEK293 cells transfected with different plasmids as indicated in the figure. The total amount of plasmid per well was normalized in all transfections by addition of pcDNA3 empty vectors. Luciferase activity is reported as relative light units and represented as mean  $\pm$ SD.
